# Supplementary material for: SLOCK (sensor for circadian clock): passive sweat-based chronobiology tracker
Source: Royal Society of Chemistry journal article supplement (doi:10.1039/d0lc00134a), 2020-01-01
Supplement: d0lc00134a1.pdf [file d0lc00134a1.pdf]

## Supplementary information

### ***SLOCK (Sensor for circadian clock): Flexible sweat-based chronobiology tracking system***

Sayali Upasham<sup>a</sup>, Shalini prasad<sup>a\*</sup>

#### 1. COMSOL Multiphysics software equations

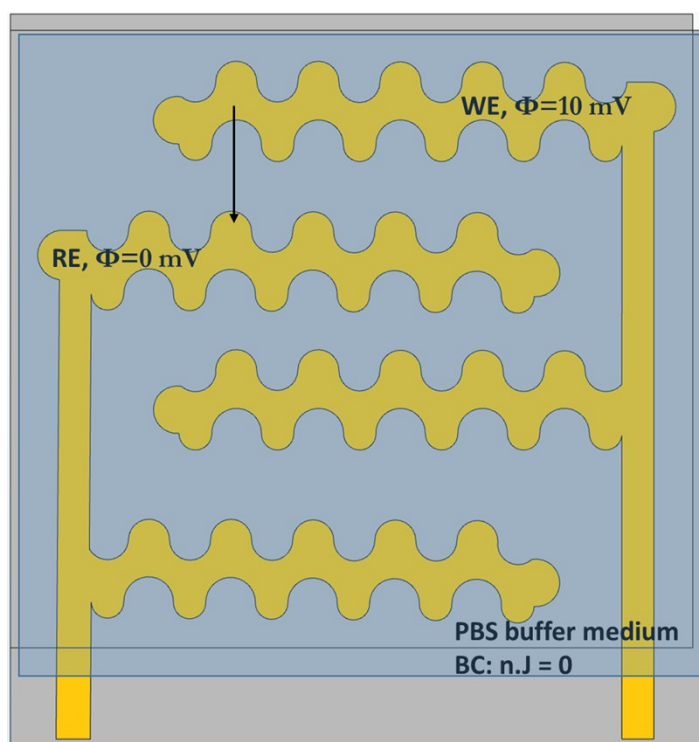

**Figure S1: COMSOL simulation boundary conditions schematic, arrow points to the direction of current density plot going to WE to RE**

Equations used in the COMSOL Multiphysics software simulations that govern the simulated potential and current density are follows:

1.  $\nabla \cdot \mathbf{J}_I = Q_I, \mathbf{J}_I = -\sigma_I \nabla \phi_I$
2.  $\nabla \cdot \mathbf{J}_S = Q_S, \mathbf{J}_S = -\sigma_S \nabla \phi_S$
3.  $\phi_S - \phi_I = E_{eq}$

$J_s$  and  $J_l$  are the current density vectors ( $A/m^2$ ) for the electrode and electrolyte respectively.  $\sigma_s$  and  $\sigma_l$  are conductivities of electrolyte and electrode domains.  $E_{eq}$  depicts the equilibrium potential difference at the electrode-electrolyte interface.<sup>1</sup>

## 2. Sensor block diagram for Human subject study

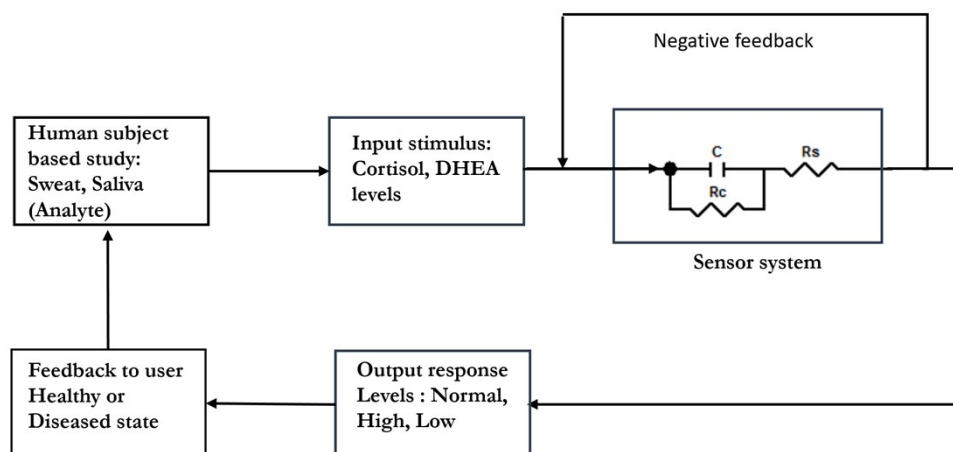

**Figure S2: Block diagram for biomarker detection**

## 3. Human subject data

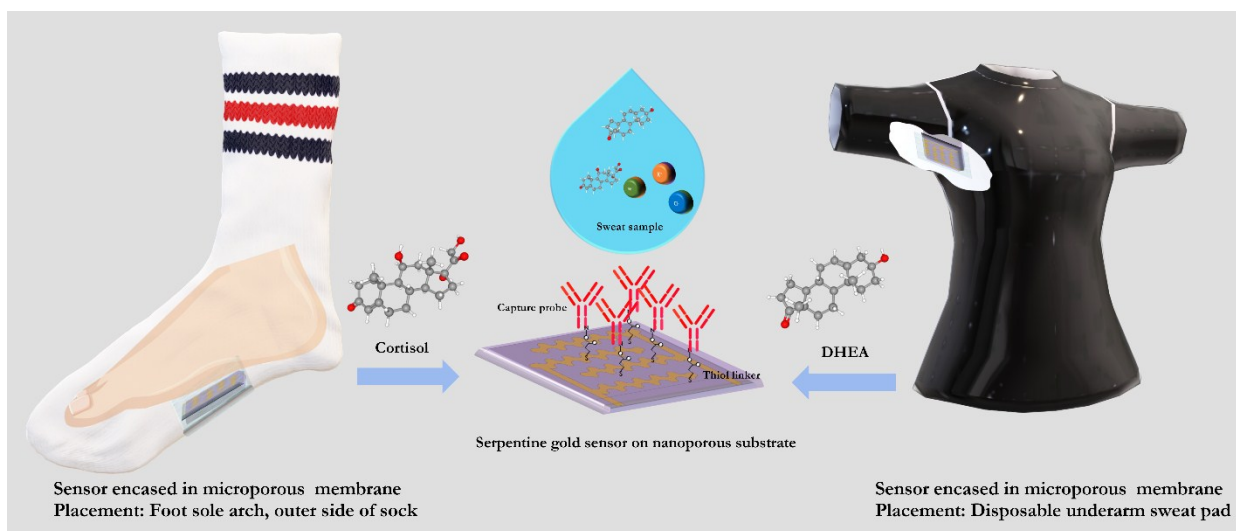

**Figure S3: Sensor schematic highlighting form factor of sensor along with immunochemistry**

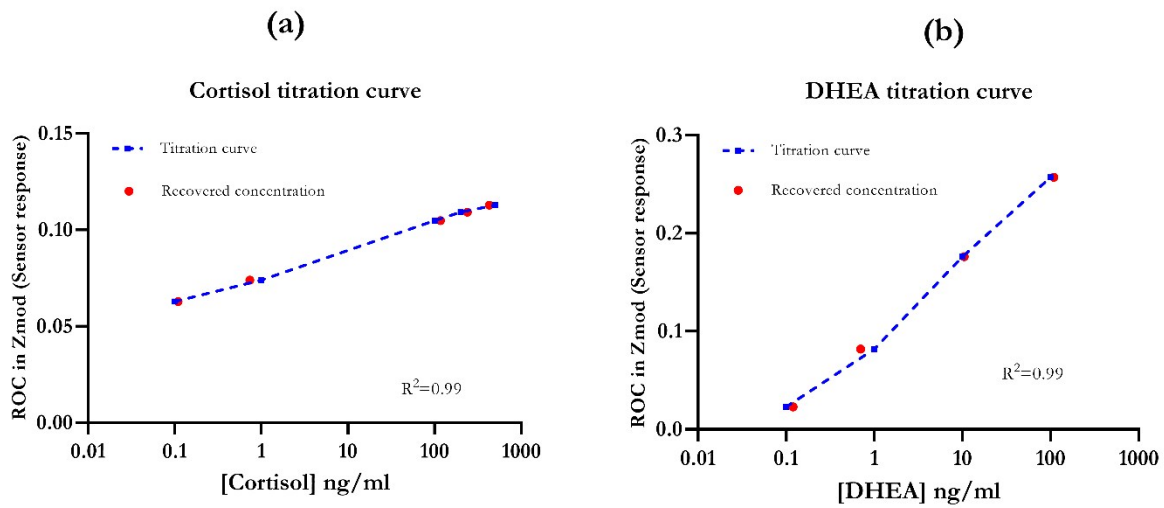

**Figure S4: Cortisol and DHEA titration curves**

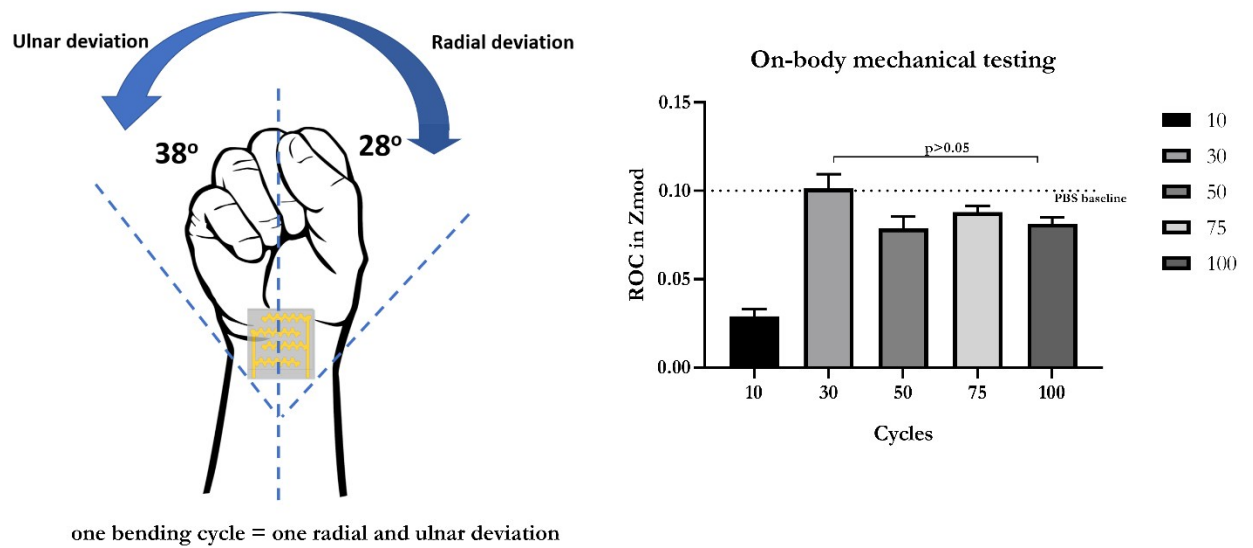

**Figure S5: On-body mechanical stability test**

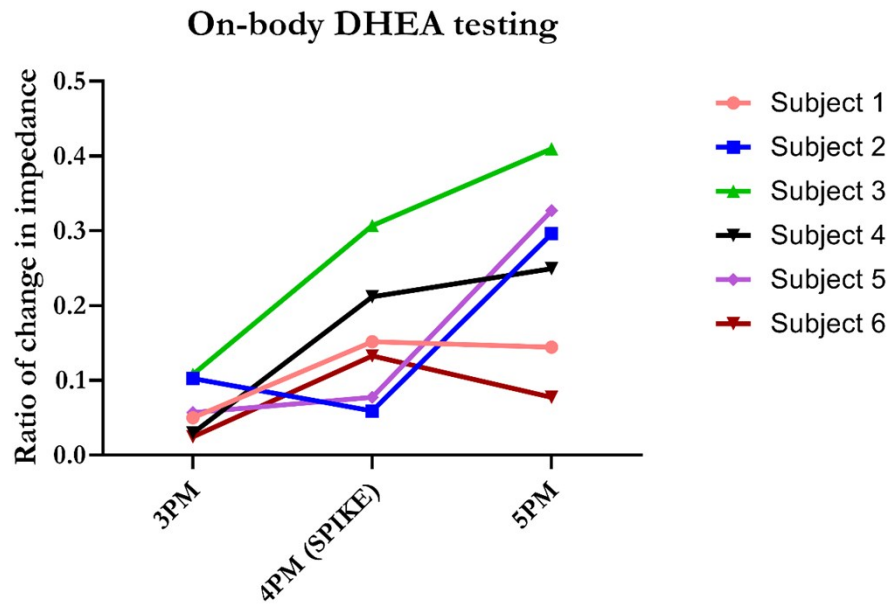

Figure S6: On-body sweat DHEA measurement across 6 subjects

#### 4. Correlation data

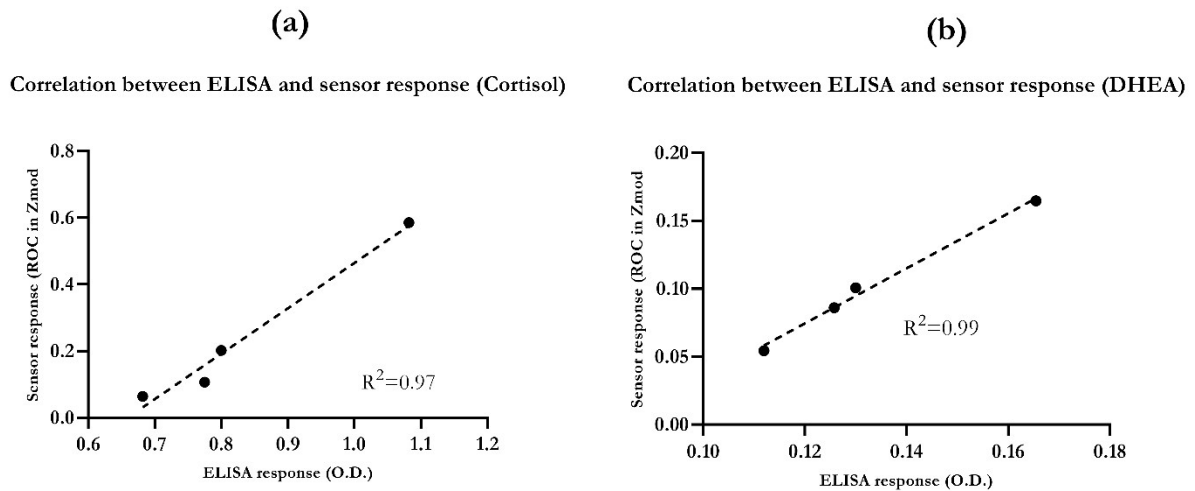

Figure S7: Correlation between sensor and commercially used ELISA

## References

- 1 H. Stevenson, N. R. Shanmugam, A. P. Selvam and S. Prasad, *SLAS Technol. Transl. Life Sci. Innov.*, 2017, **23**, 5–15.
